# Supplementary material for: Synthesis of palladium nanocatalysts with cucurbit[n]uril as both a protecting agent and a support for Suzuki and Heck reactions
Source: Royal Society of Chemistry journal article supplement (doi:10.1039/c1cy00324k), 2011-10-21

# Supporting Information

## Synthesis of Palladium Nanocatalysts with Cucurbit[n]uril as Both Protecting Agent and Support for Suzuki and Heck Reactions

Minna Cao, Ye Wei, Shuiying Gao, and Rong Cao\*<sup>a</sup>

<sup>a</sup> State Key Laboratory of Structural Chemistry, Fujian Institute of Research on the Structure of Matter, the Chinese Academy of Science, Fuzhou 350002, China. Fax: +86 59183796710; Tel: +86 59183796710; E-mail: [rcao@fjirsm.ac.cn](mailto:rcao@fjirsm.ac.cn)

### *Table of contents*

1. Figure S1, size distribution of near spherical CB[6]-Pd NPs and CB[7]-Pd NPs.
2. Figure S2, XRD pattern of CB[6]-Pd NPs prepared with different ratio of PdCl<sub>2</sub> to CB[6].
3. Figure S3, TEM images of CB[6]-Pd NPs 1 after catalyzed Heck coupling reaction with high catalyst loading up to 3 mol% (table 2, entry 3)
4. Original <sup>1</sup>H NMR and <sup>13</sup>C NMR spectra of the Suzuki coupling reaction products.
5. Original <sup>1</sup>H NMR and <sup>13</sup>C NMR spectra of the Heck coupling reaction products.

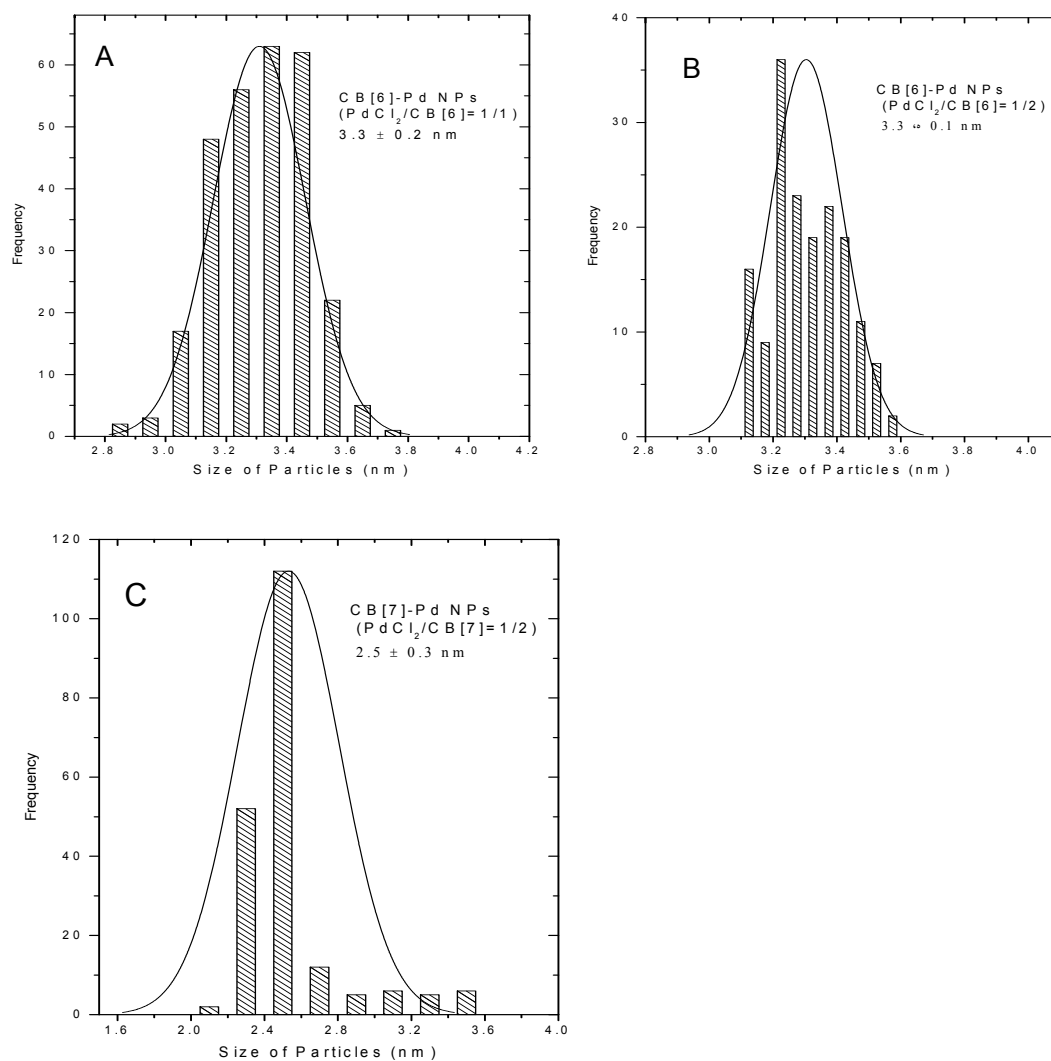

**Figure S1.** Size distribution of CB[6]-Pd NPs 1 with the ratio of PdCl<sub>2</sub> to CB[6] is 1:1(A) and 1:2(B); CB[7]-Pd NPs (C)

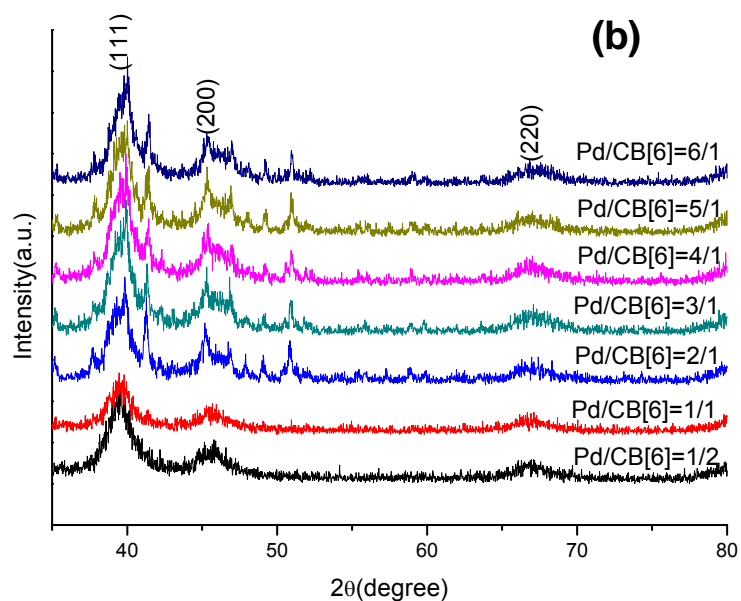

**Figure S2.** PXRD patterns of CB[6]-Pd NPs with the molar ratio of PdCl<sub>2</sub> to CB[6] of (a) 1:1 (b) between 1:2 and 6:1. The four main peaks correspond to (111), (200), (220) and (311) Bragg reflection of face-centered cubic (fcc) Pd.

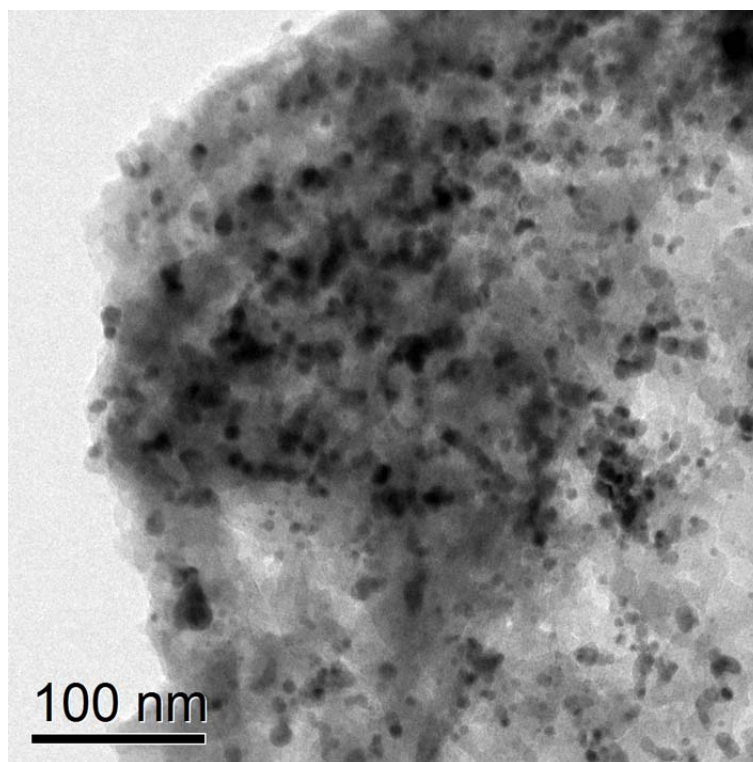

**Figure S3.** TEM images of CB[6]-Pd NPs **1** after catalyzed Heck coupling reaction with high catalyst loading up to 3 mol% (table 2, entry 3)

### 3. characterization for the products of Suzuki coupling reactions :

#### ( 1 ) $^1\text{H}$ NMR and $^{13}\text{C}$ NMR of Biphenyl

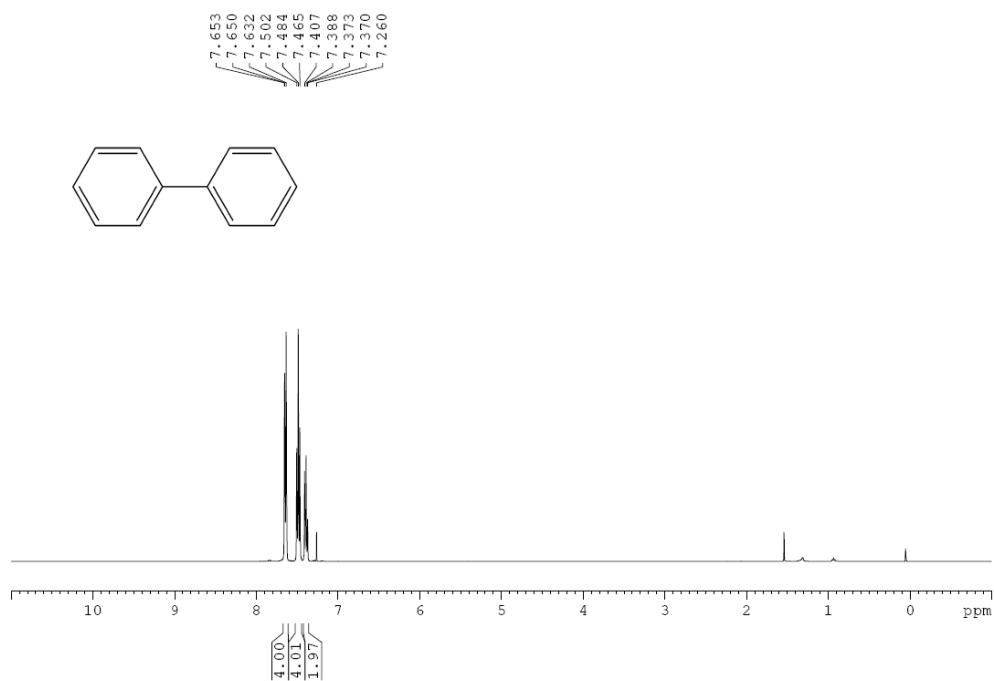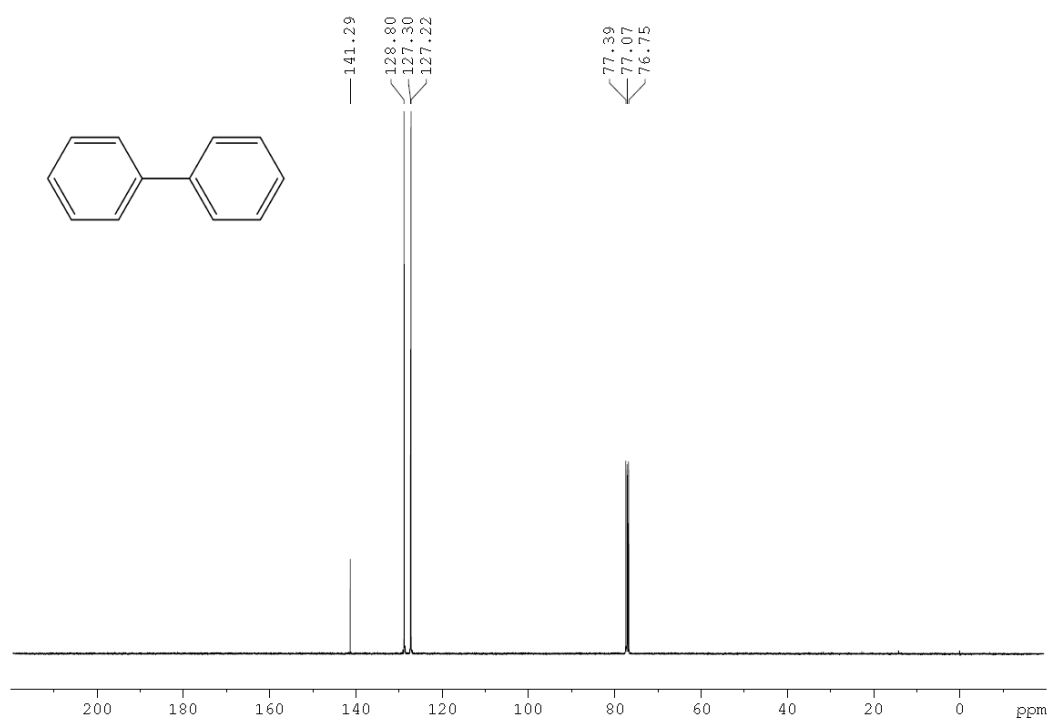

## (2) $^1\text{H}$ NMR and $^{13}\text{C}$ NMR Ethylbiphenyl

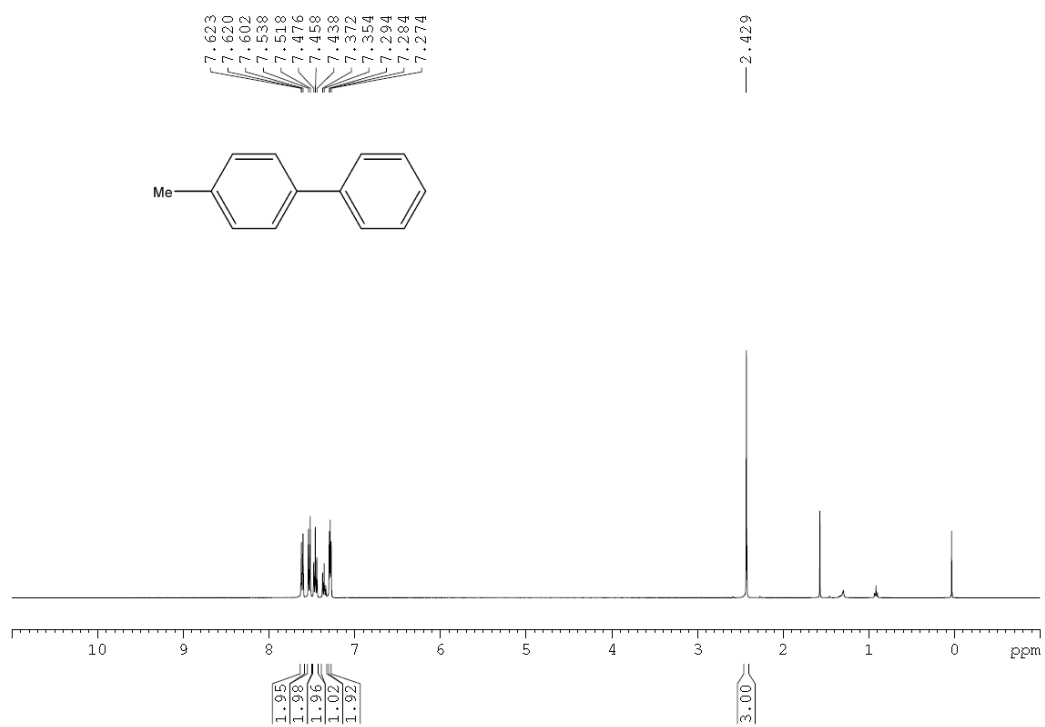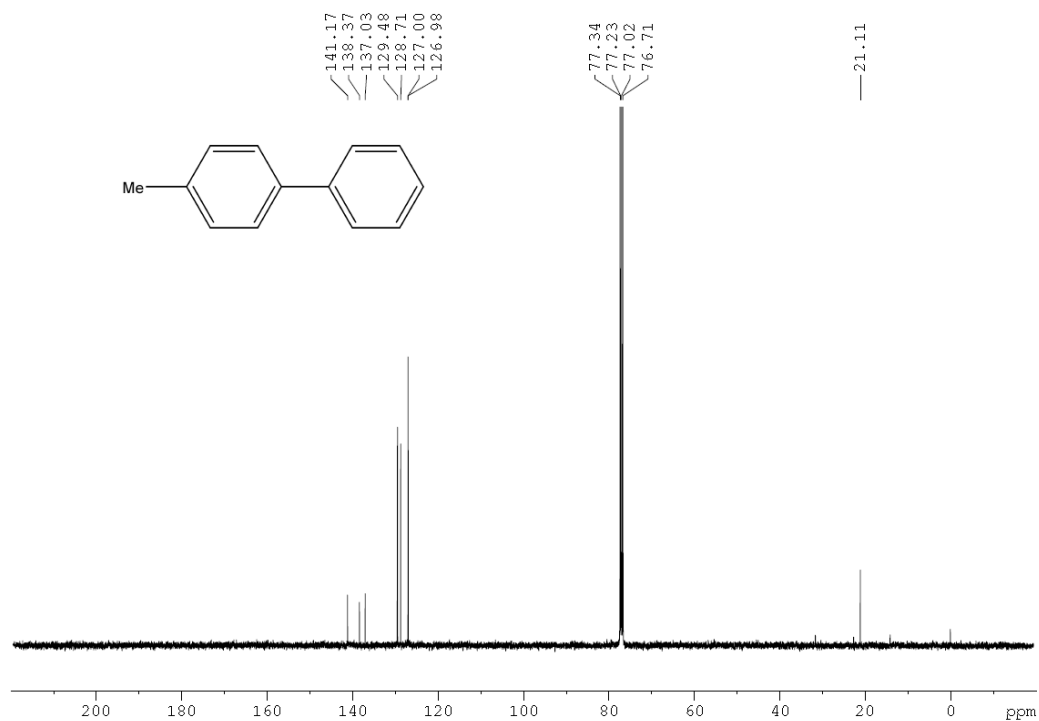

### (3) $^1\text{H}$ NMR and $^{13}\text{C}$ NMR 4-Methoxybiphenyl

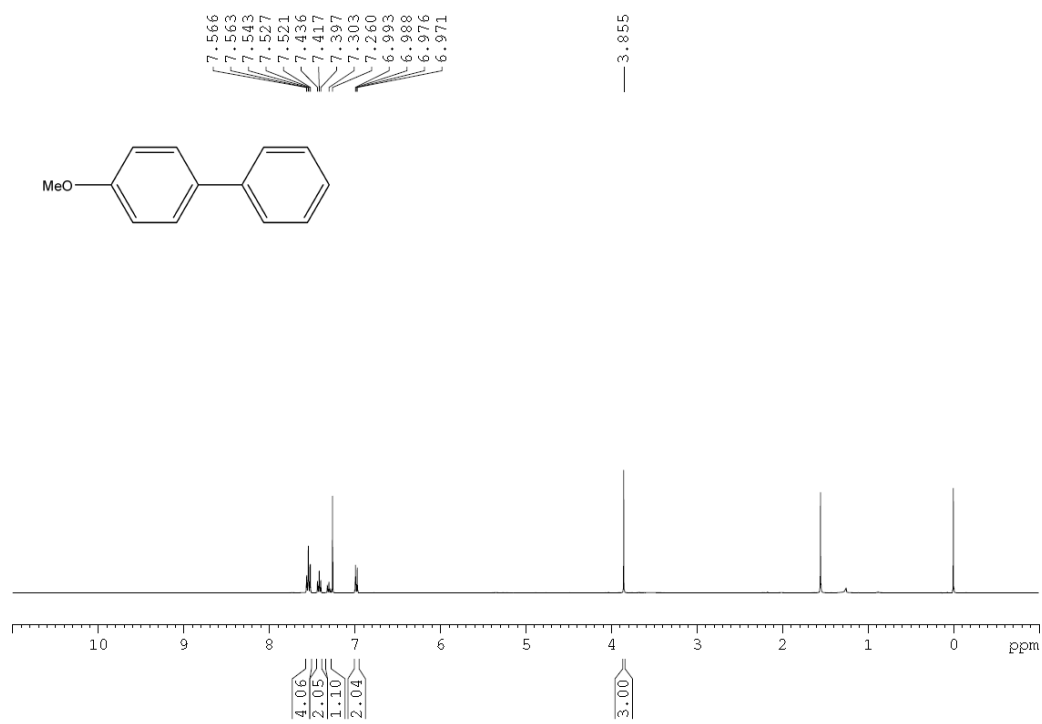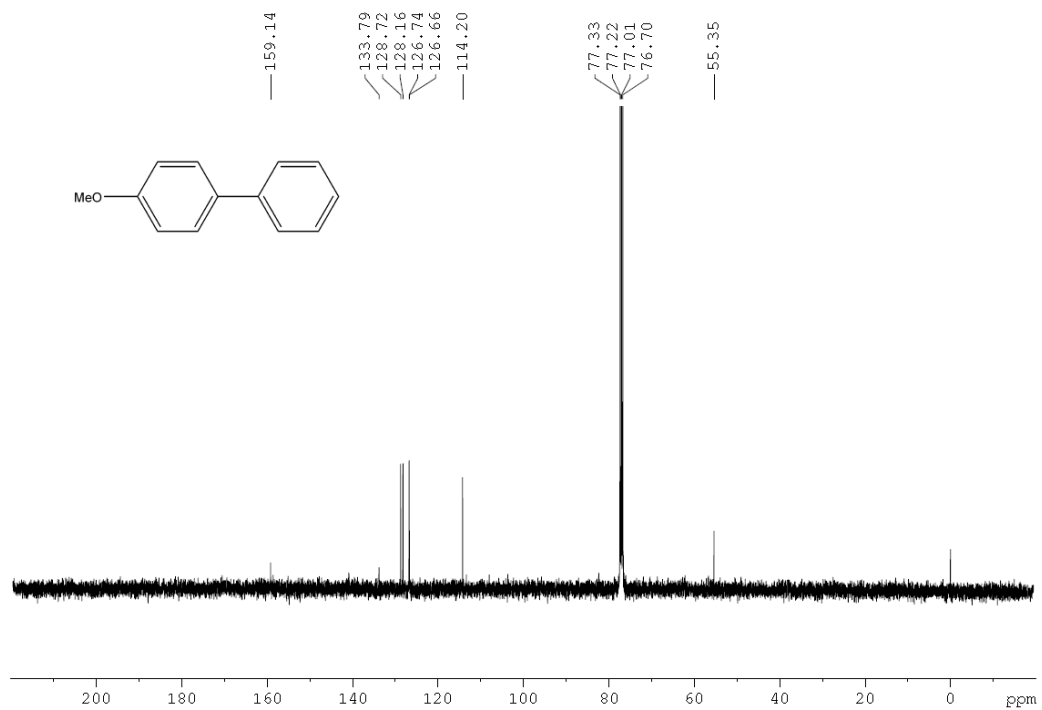

#### (4) $^1\text{H}$ NMR and $^{13}\text{C}$ NMR 4,4'-Dimethylbiphenyl

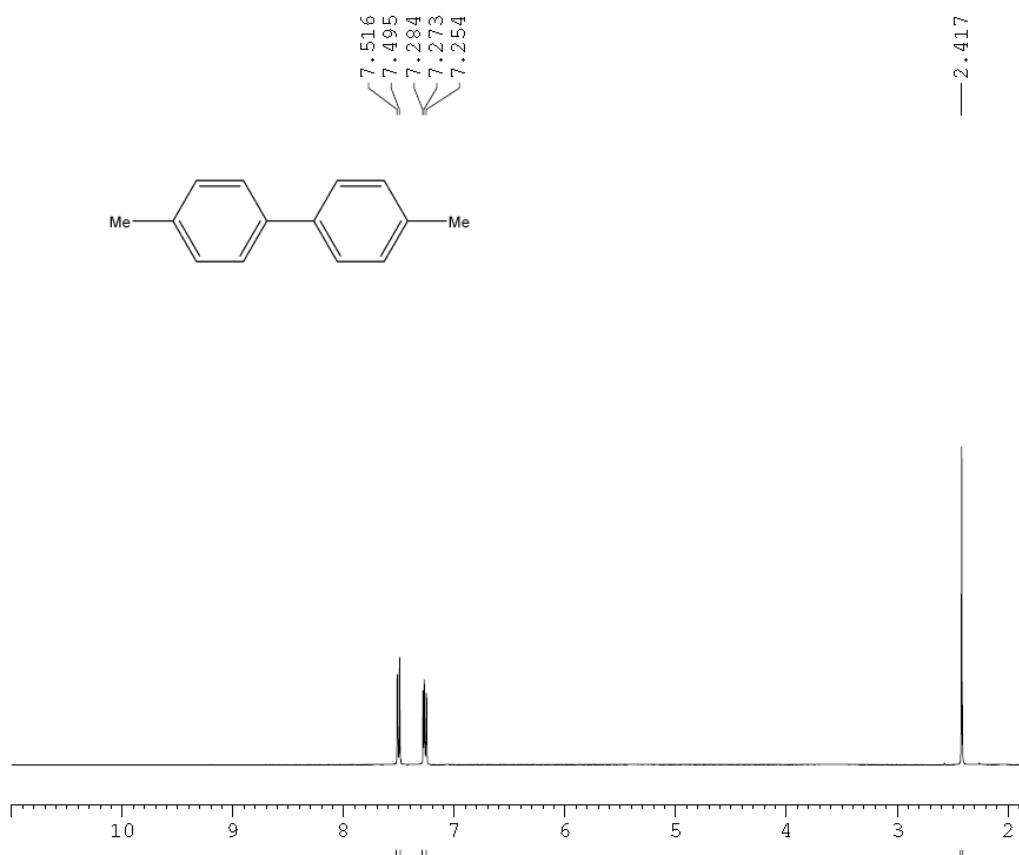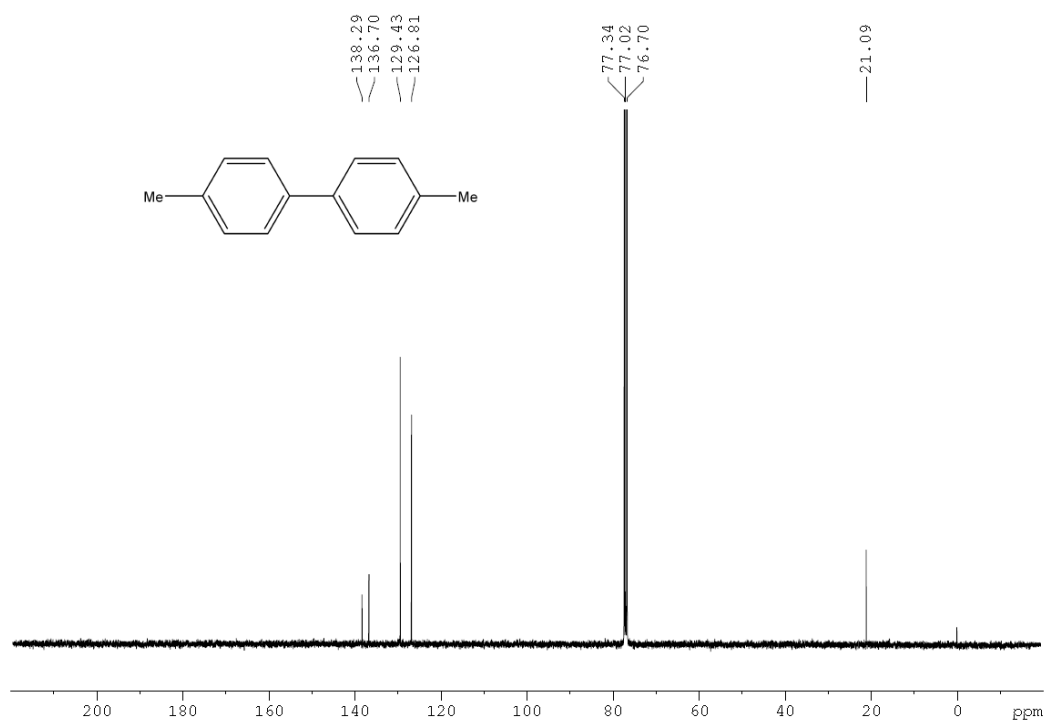

(5)  $^1\text{H}$  NMR and  $^{13}\text{C}$  NMR 4-Methoxy -4'-methylbiphenyl

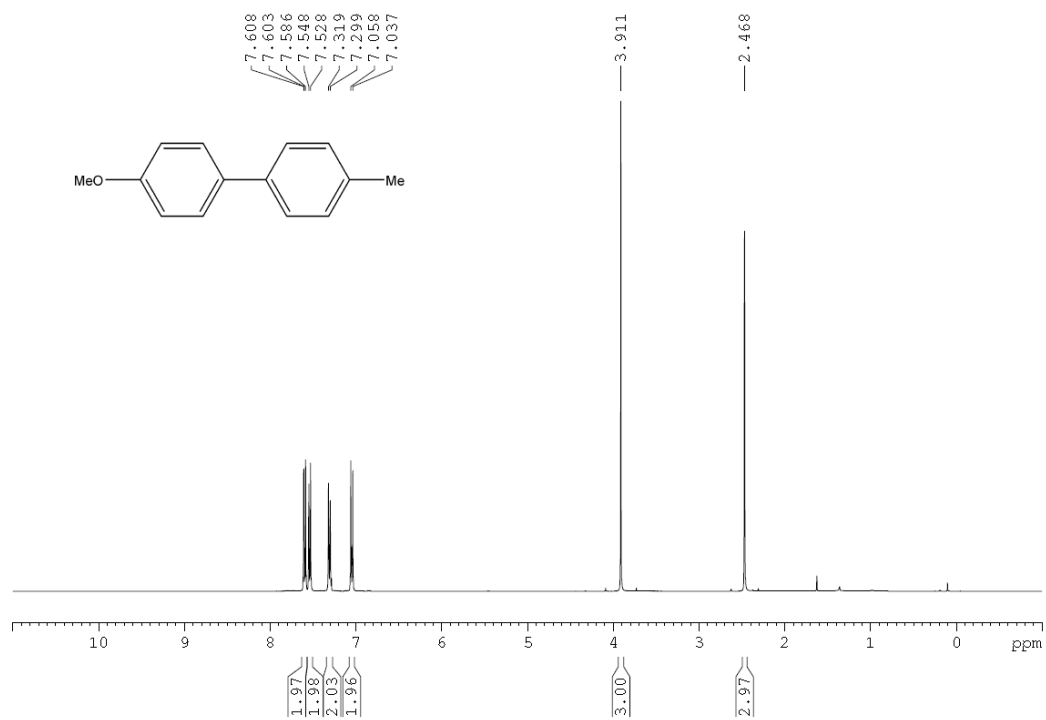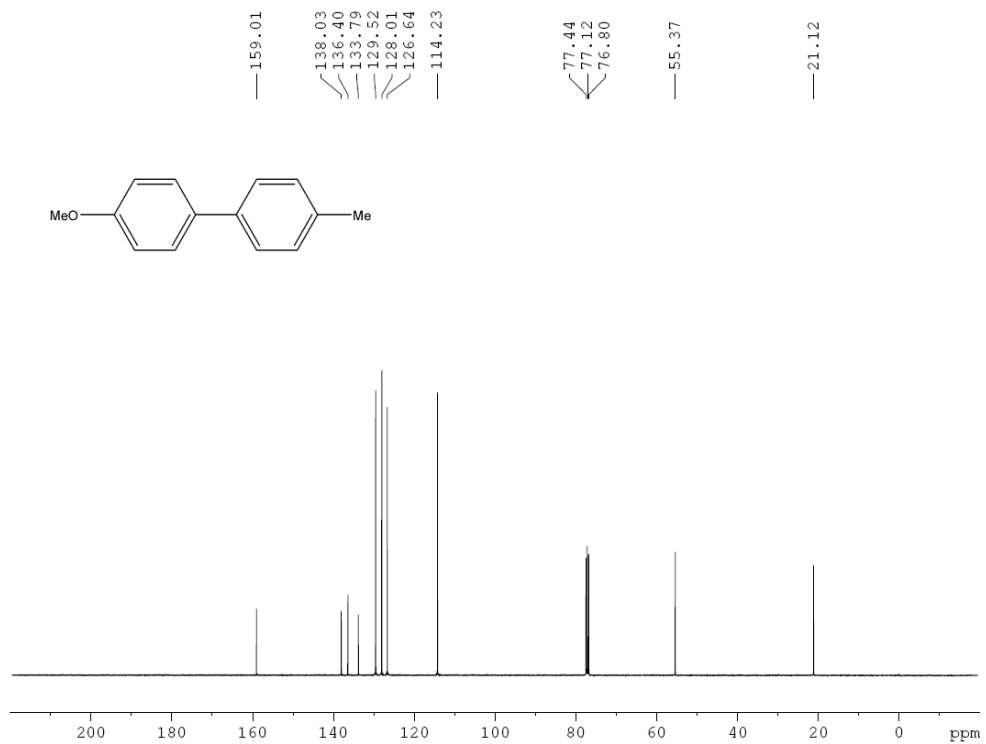



### (6) $^1\text{H}$ NMR and $^{13}\text{C}$ NMR 4-Acetylbiphenyl

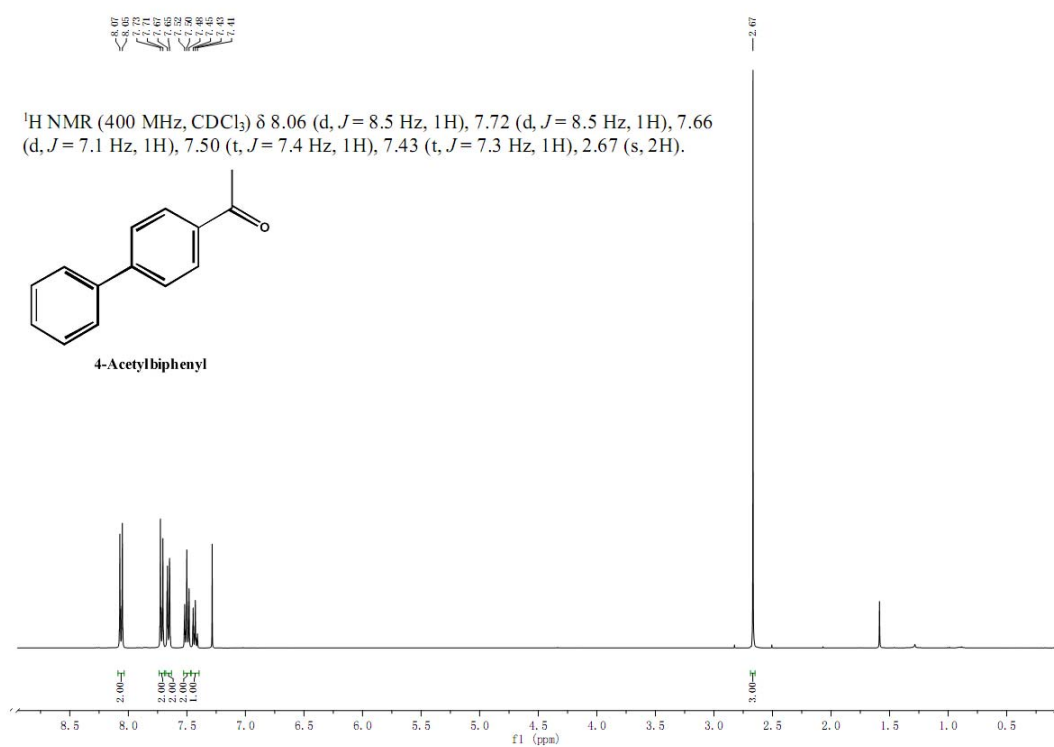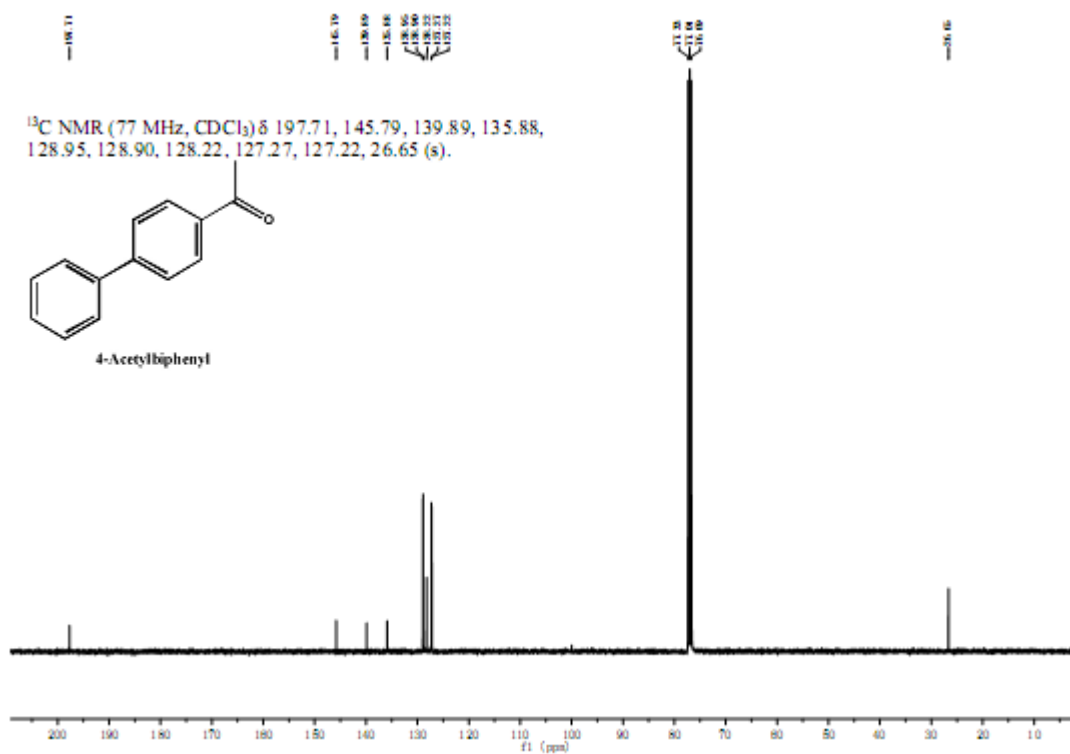

The  $^1\text{H}$  and  $^{13}\text{C}$  spectra were in accordance with those described in literature.

**1) Biphenyl**

Z. Tang, Q. Hu, *J. Am. Chem. Soc.*, 2004, **126**, 3058

**2) 4,4'-Dimethylbiphenyl**

L. Wu, B. Li, Y. Huang, H. Zhou, Y. He, Q. Fan, *Org. Lett.* 2006, **8**, 3605.

**3) 4-Methylbiphenyl, 4-Methoxybiphenyl and 4-Methoxy-4'-methylbiphenyl**

N. Yoshikai, H. Mashima and E. Nakamura, *J. Am. Chem. Soc.*, 2005, **127**, 17978.

**2. characterization for the products of Heck coupling reactions :**

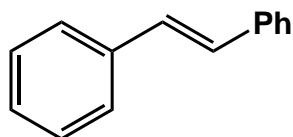

**trans-stilbene**<sup>1</sup>:  $^1\text{H}$  NMR (400 MHz,  $\text{CDCl}_3$ )  $\delta$  7.51 (d,  $J = 7.2$  Hz, 4H), 7.35 (t,  $J = 7.6$  Hz, 4H), 7.27 – 7.21 (m, 2H), 7.10 (s, 2H).  $^{13}\text{C}$  NMR (77 MHz,  $\text{CDCl}_3$ )  $\delta$  137.35, 128.69, 127.61, 126.51.

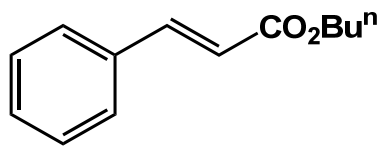

**trans-cinnamic acid n-butyl ester**<sup>2</sup>:  $^1\text{H}$  NMR (400 MHz,  $\text{CDCl}_3$ )  $\delta$  7.71 (d,  $J = 16.0$  Hz, 1H), 7.62 – 7.45 (m, 2H), 7.43 – 7.17 (m, 3H), 6.47 (d,  $J = 16.0$  Hz, 1H), 4.24 (t,  $J = 6.7$  Hz, 2H), 1.83 – 1.59 (m, 2H), 1.61 – 1.21 (m, 2H), 0.99 (t,  $J = 7.4$  Hz, 3H).  $^{13}\text{C}$  NMR (77 MHz,  $\text{CDCl}_3$ )  $\delta$  167.02, 144.51, 134.50, 130.18, 128.85, 128.03, 118.33, 64.39, 30.81, 19.21, 13.75.

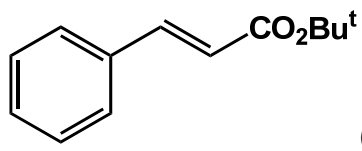

**trans-cinnamic acid t-butyl ester**<sup>3</sup>:  $^1\text{H}$  NMR (400 MHz,  $\text{CDCl}_3$ )  $\delta$  7.59 (d,  $J = 16.0$  Hz, 1H), 7.51 – 7.47 (m, 2H), 7.38 – 7.25 (m, 3H), 6.36 (d,  $J = 16.0$  Hz, 1H), 1.53 (s, 9H).  $^{13}\text{C}$  NMR (77 MHz,  $\text{CDCl}_3$ )  $\delta$  166.30, 143.53, 134.69, 129.94, 128.81, 127.94, 120.22, 80.46, 28.21 (s).

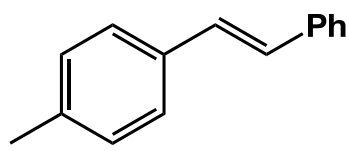

**4-methyl-trans-stilbene**<sup>1</sup>:  $^1\text{H}$  NMR (400 MHz,  $\text{CDCl}_3$ )  $\delta$  7.55 (d,  $J = 7.3$  Hz, 2H), 7.47 (d,  $J = 8.1$  Hz, 2H), 7.40 (t,  $J = 7.6$  Hz, 2H), 7.26-7.33 (m, 1H), 7.22 (d,  $J = 7.9$  Hz, 2H), 7.13 (d,  $J = 2.5$  Hz, 2H), 2.41 (s, 3H).  $^{13}\text{C}$  NMR (77 MHz,  $\text{CDCl}_3$ )  $\delta$  137.56, 134.53, 129.41, 128.66, 127.74, 127.42, 126.44, 21.27.

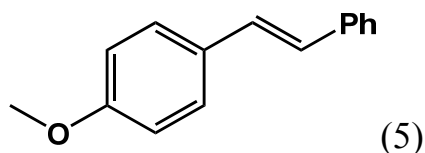

**4-methoxy-*trans*-stilbene**<sup>2</sup>: <sup>1</sup>H NMR (400 MHz, CDCl<sub>3</sub>) δ 7.56 – 7.46 (m, 4H), 7.39 (t, *J* = 7.6 Hz, 2H), 7.28 (t, *J* = 7.3 Hz, 1H), 7.12 (d, *J* = 16.3 Hz, 1H), 7.02 (d, *J* = 16.3 Hz, 1H), 6.95 (d, *J* = 8.8 Hz, 2H), 3.87 (s, 3H). <sup>13</sup>C NMR (77 MHz, CDCl<sub>3</sub>) δ 159.34, 137.69, 130.19, 128.66, 128.25, 127.74, 127.23, 126.66, 126.28, 114.17, 55.34.

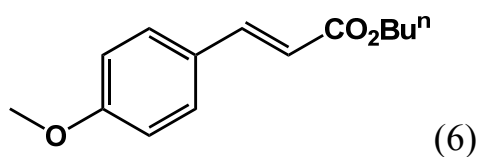

**4-methoxy-*trans*-cinnamic acid *n*-butyl ester**<sup>2</sup>: <sup>1</sup>H NMR (400 MHz, CDCl<sub>3</sub>) δ 7.63 (d, *J* = 16.0 Hz, 1H), 7.45 (d, *J* = 8.5 Hz, 2H), 6.87 (d, *J* = 8.5 Hz, 2H), 6.30 (d, *J* = 16.0 Hz, 1H), 4.19 (t, *J* = 6.7 Hz, 2H), 3.79 (s, 3H), 1.67 (m, *J* = 14.6, 6.9 Hz, 2H), 1.43 (m, *J* = 15.0, 7.5 Hz, 2H), 0.96 (t, *J* = 7.4 Hz, 3H). <sup>13</sup>C NMR (77 MHz, CDCl<sub>3</sub>) δ 167.29, 161.32, 144.13, 129.63, 127.17, 115.74, 114.27, 64.16, 55.24, 30.82, 19.20, 13.72.

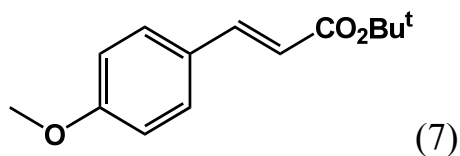

**4-methoxy-*trans*-cinnamic acid *t*-butyl ester**<sup>4</sup>: <sup>1</sup>H NMR (400 MHz, CDCl<sub>3</sub>) δ 7.56 (d, *J* = 15.9 Hz, 1H), 7.47 (d, *J* = 8.8 Hz, 2H), 6.90 (d, *J* = 8.7 Hz, 2H), 6.26 (d, *J* = 15.9 Hz, 1H), 3.84 (s, 3H), 1.55 (s, 9H). <sup>13</sup>C NMR (77 MHz, CDCl<sub>3</sub>) δ 166.65, 161.12, 143.18, 129.52, 127.40, 117.72, 114.25, 80.18, 55.31, 28.23.

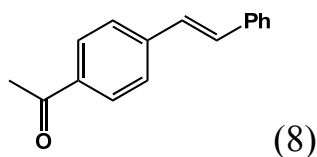

**4-acetyl-*trans*-stilbene**<sup>5</sup>: <sup>1</sup>H NMR (400 MHz, CDCl<sub>3</sub>) δ 7.98 (d, *J* = 8.3 Hz, 2H), 7.61 (d, *J* = 8.3 Hz, 2H), 7.57 (d, *J* = 7.4 Hz, 2H), 7.44 – 7.30 (m, 3H), 7.26 (d, *J* = 16.4 Hz, 1H), 7.16 (d, *J* = 16.3 Hz, 1H), 2.63 (s, 3H). <sup>13</sup>C NMR (101 MHz, CDCl<sub>3</sub>) δ 197.43, 142.01, 136.71, 135.98, 131.47, 128.87, 128.80, 128.31, 127.46, 126.82, 126.50, 26.57.

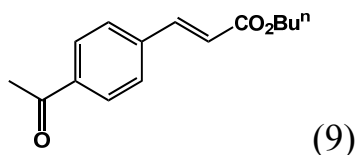

**4-acetyl-*trans*-cinnamic acid *n*-butyl ester**<sup>6</sup>: <sup>1</sup>H NMR (400 MHz, CDCl<sub>3</sub>) δ 7.96 (d, *J* = 7.4 Hz, 2H), 7.68 (d, *J* = 16.0 Hz, 1H), 7.60 (d, *J* = 7.4 Hz, 2H), 6.52 (d, *J* = 16.0 Hz, 1H), 4.22 (t, *J* = 7.0 Hz, 2H), 2.61 (s, 3H), 1.74 – 1.65 (m, 1H), 1.44-1.51 (m, 2H), 0.97 (t, *J* = 7.4 Hz, 3H). <sup>13</sup>C NMR (77 MHz, CDCl<sub>3</sub>) δ 197.19, 166.50, 142.91, 138.79, 137.96, 128.80, 128.0, 120.83, 64.63, 30.72, 26.62, 19.16, 13.70.

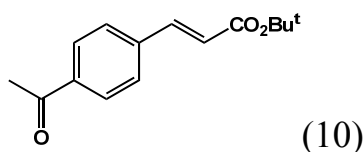

**4-acetyl-*trans*-cinnamic acid *t*-butyl ester**<sup>7</sup>: <sup>1</sup>H NMR (400 MHz, CDCl<sub>3</sub>) δ 7.96 (d, *J* = 8.3 Hz, 2H), 7.69 – 7.53 (m, 3H), 6.46 (d, *J* = 16.1 Hz, 1H), 2.61 (s, 3H), 1.55 (s, 9H). <sup>13</sup>C NMR (77 MHz, CDCl<sub>3</sub>) δ 197.26, 165.72, 141.93, 139.05, 137.79, 128.79, 127.98, 122.77, 80.89, 28.15, 26.62.

The <sup>1</sup>H and <sup>13</sup>C spectra were in accordance with those described in literature.

- (1) Dai, M.-J.; Liang, B.; Wang, C.-H.; Chen, J.-H.; Yang, Z. *Org. Lett.* **2003**, *6*, 221. (products 1 and 4)
- (2) Yao, Q.-W.; Elizabeth, P. K.; Zheng, C. *Org. Lett.* **2004**, *6*, 2997. (products 2, 5 and 6)
- (3) Erathodiyil, N.; Ooi, S.; Seayad, A. M.; Han, Y.; Lee, S. S.; Ying, J. Y. *Chem. Eur. J.* **2008**, *14*, 3118. (product 3)
- (4) Kantchev, E. A. B.; Peh, G.-R.; Zhang, C.; Ying, J. Y. *Org. Lett.* **2008**, *10*, 3949. (product 4 and 7)
- (5) Lucas, R. M.; Kevin, H. S. *Org. Lett.* **2004**, *6*, 225. (product 8)
- (6) Dams, M.; Drijkoningen, L.; Panwels, B.; Tendeloo, G. V.; Vos, D. E.; Jacobs, P. A. *J. Catal.* **2002**, *209*, 225. (product 9)
- (7) Haneda, S.; Ueba, C.; Eda, K.; Hayashi, M. *Adv. Synth. Catal.* **2007**, *349*, 833. (product 10)

## Original $^1\text{H}$ and $^{13}\text{C}$ NMR Spectra for the products of Heck coupling

reactions:

(1) *trans*-stilbene:

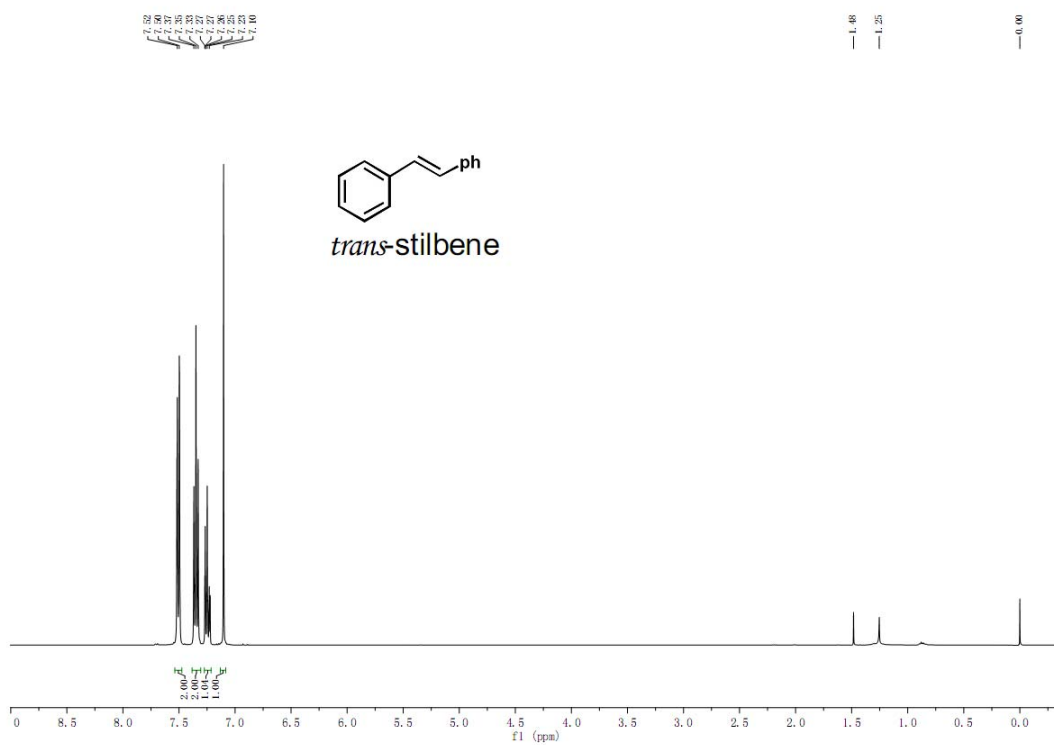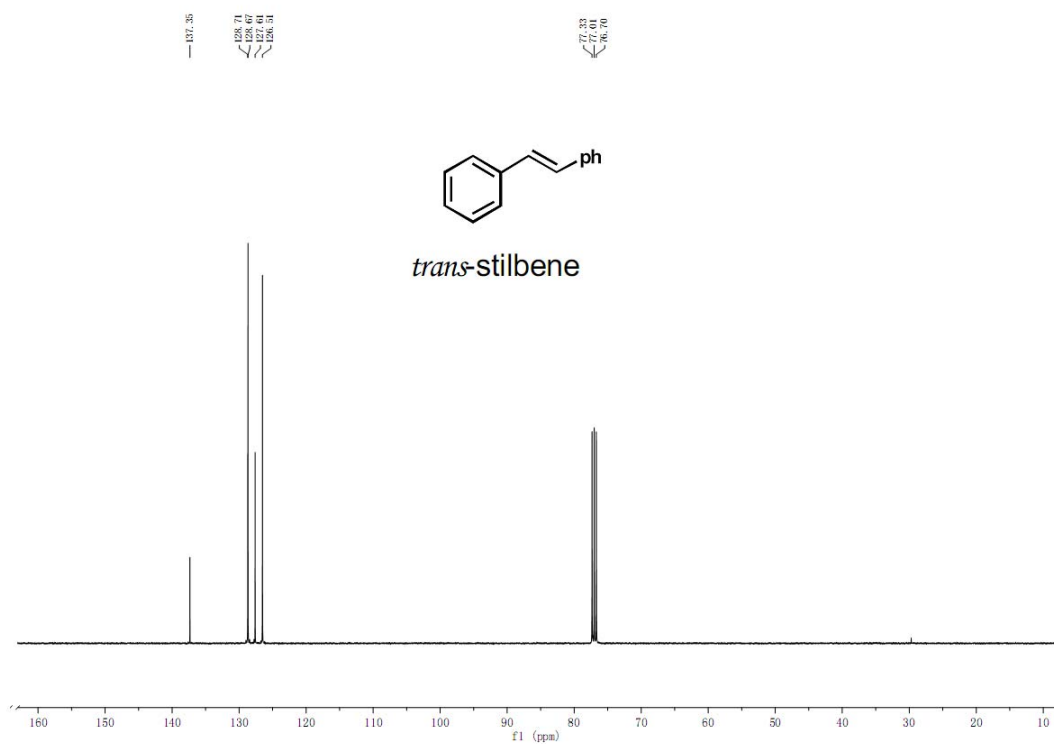

(2) *trans*-cinnamic acid *n*-butyl ester:

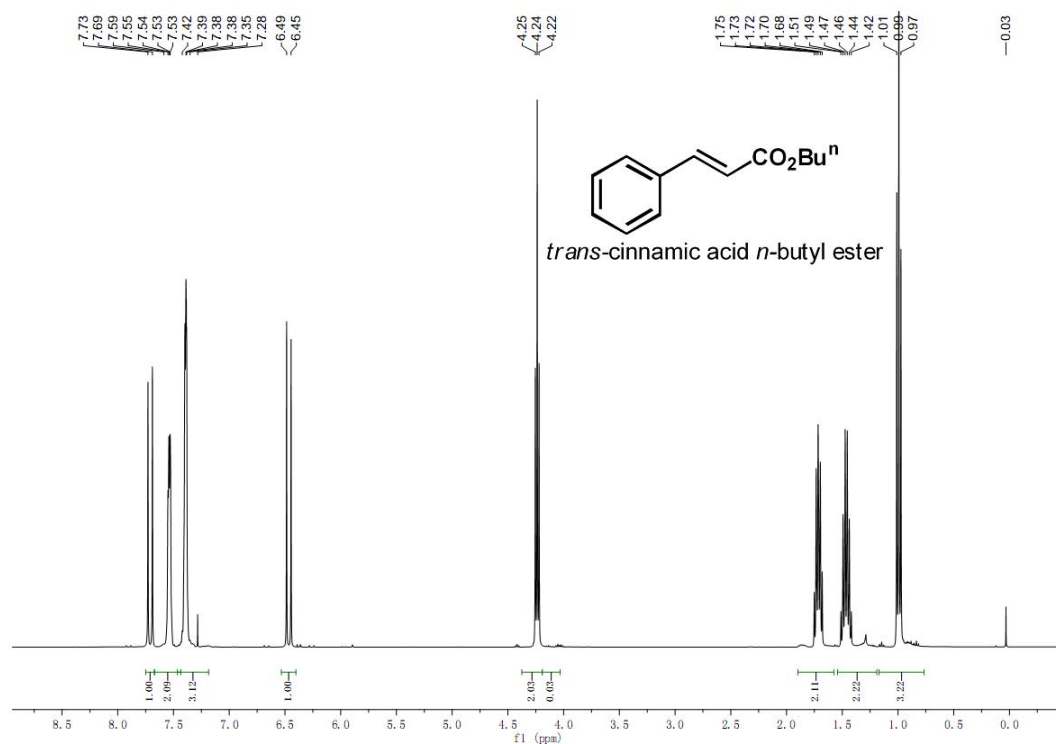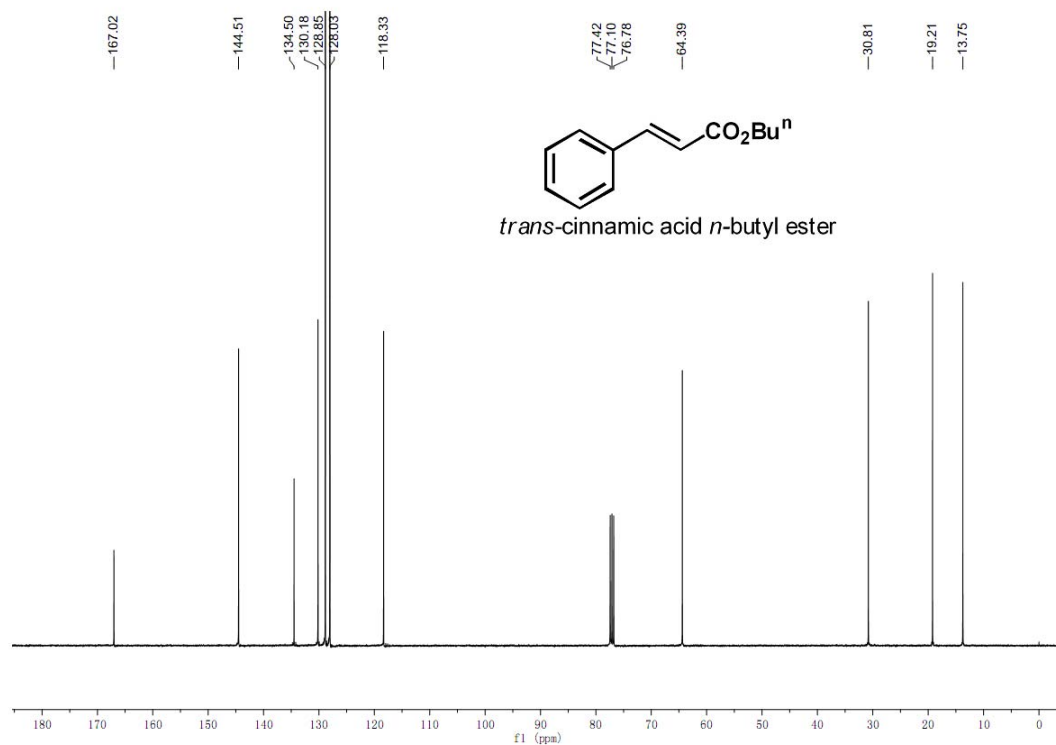

(3) *trans*-cinnamic acid *t*-butyl ester

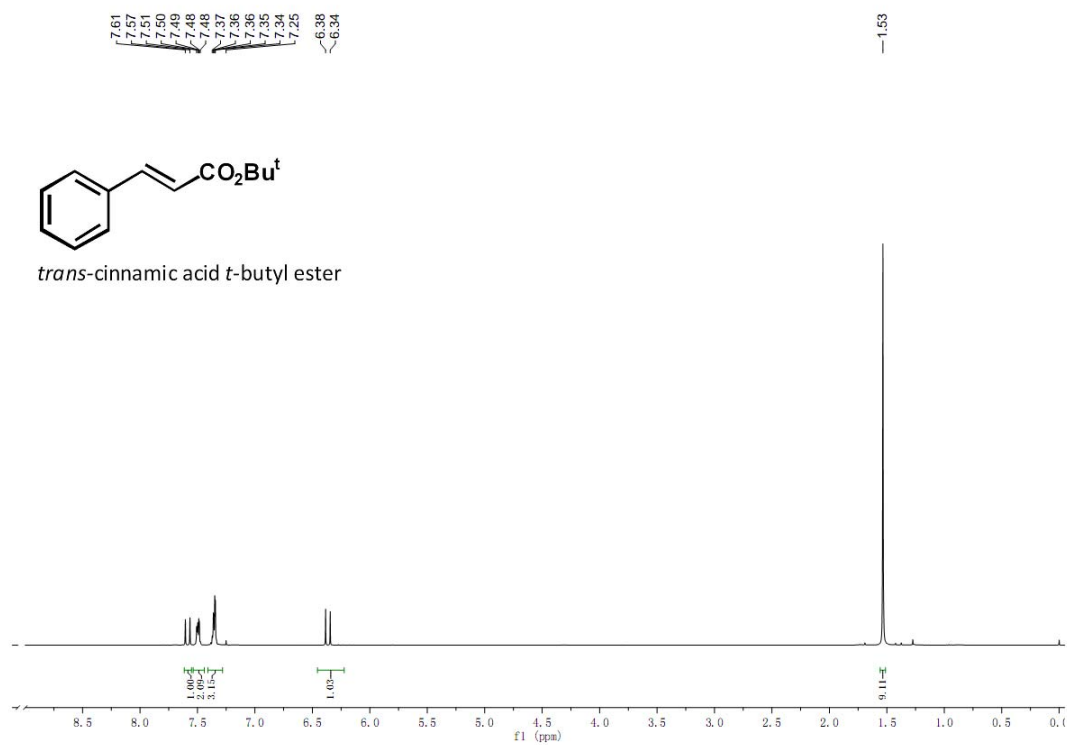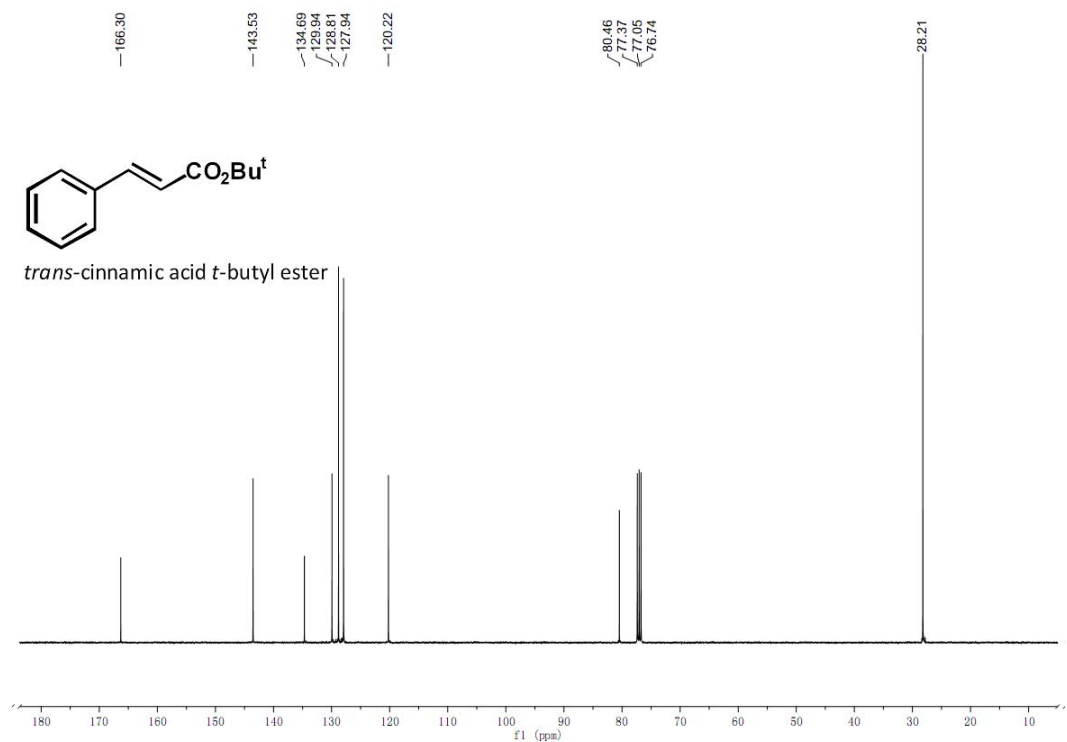

#### (4) 4-methyl-*trans*-stilbene

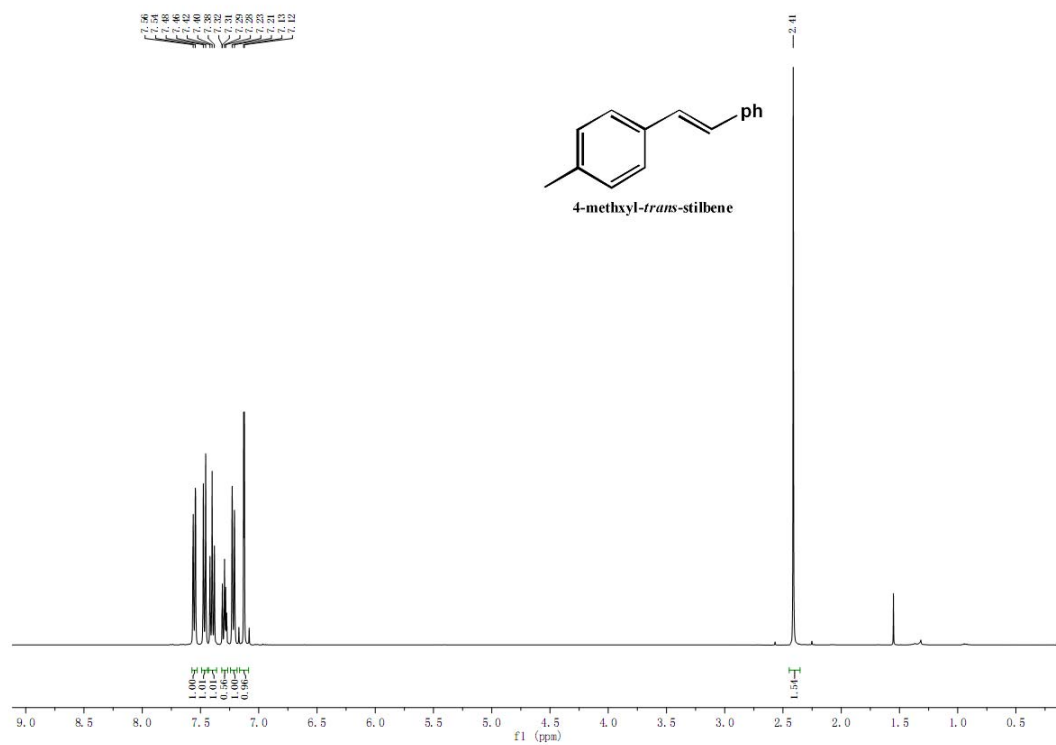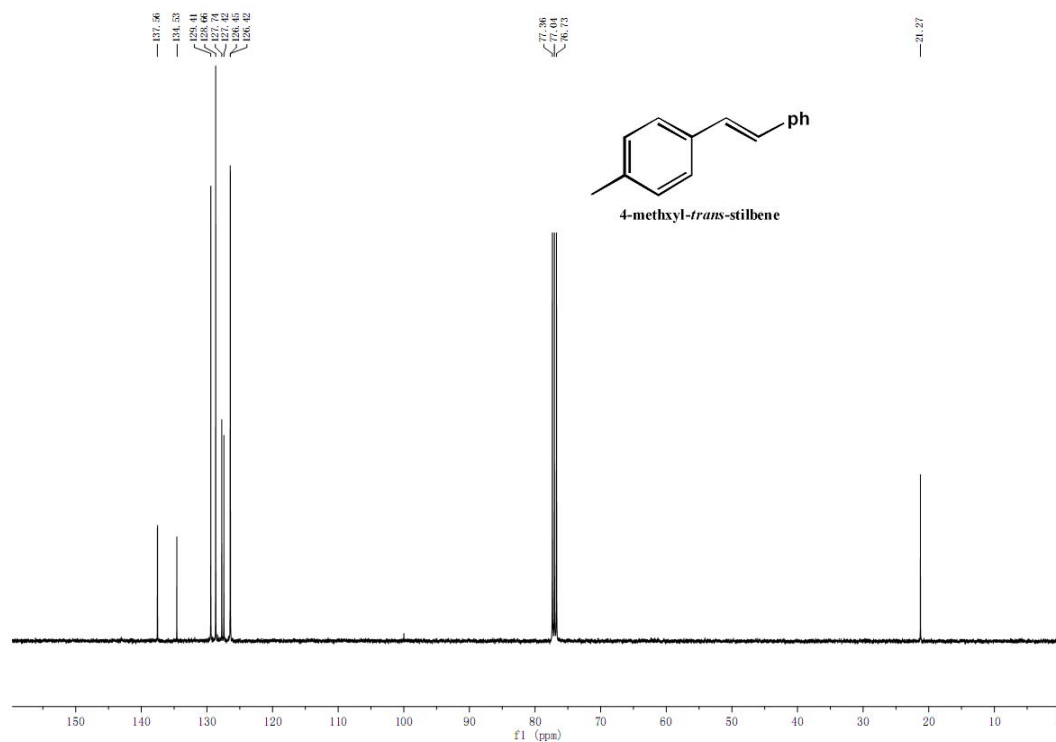





### (6) 4-methoxy-*trans*-cinnamic acid *n*-butyl ester

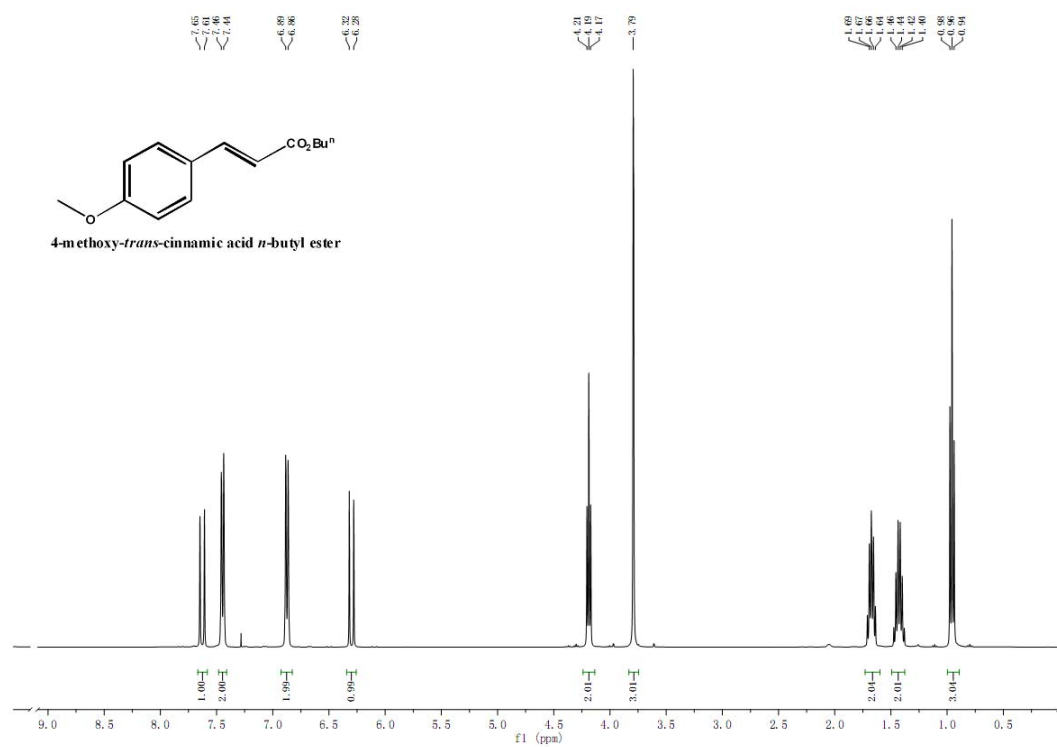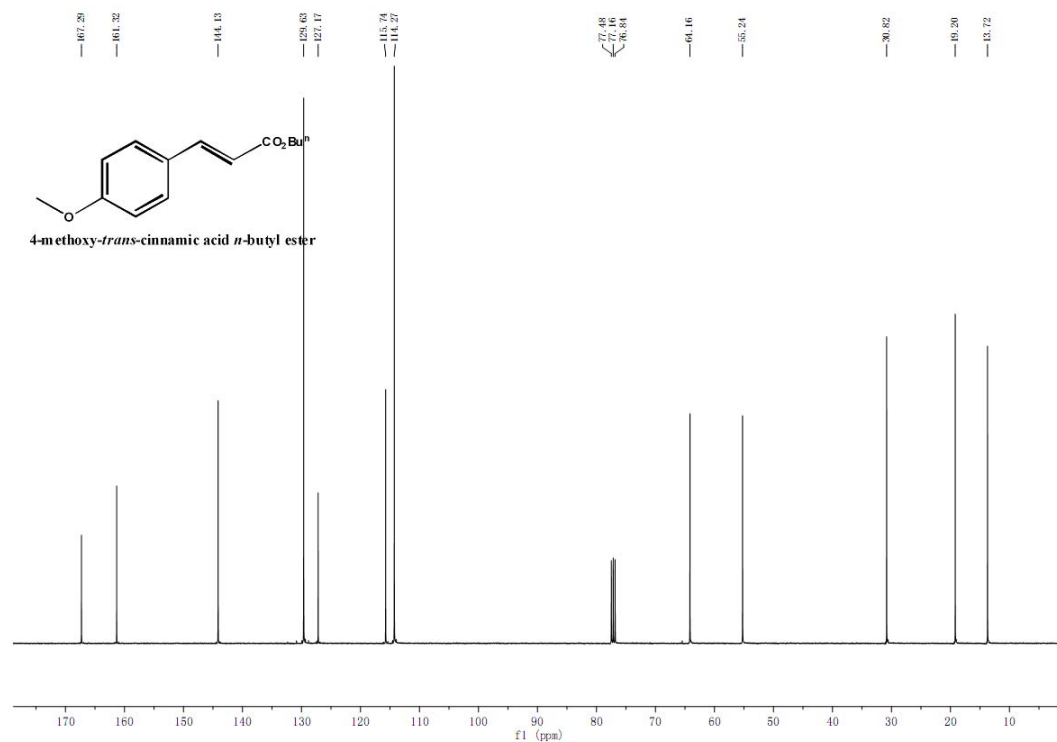

(7) 4-methoxy-*trans*-cinnamic acid *t*-butyl ester

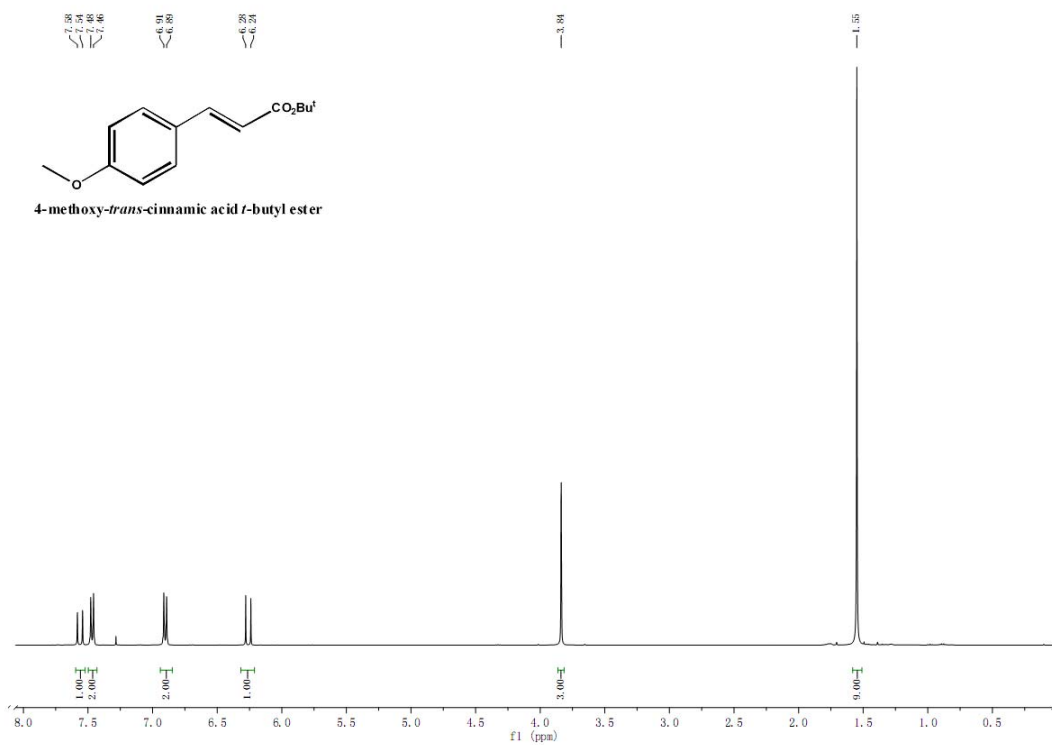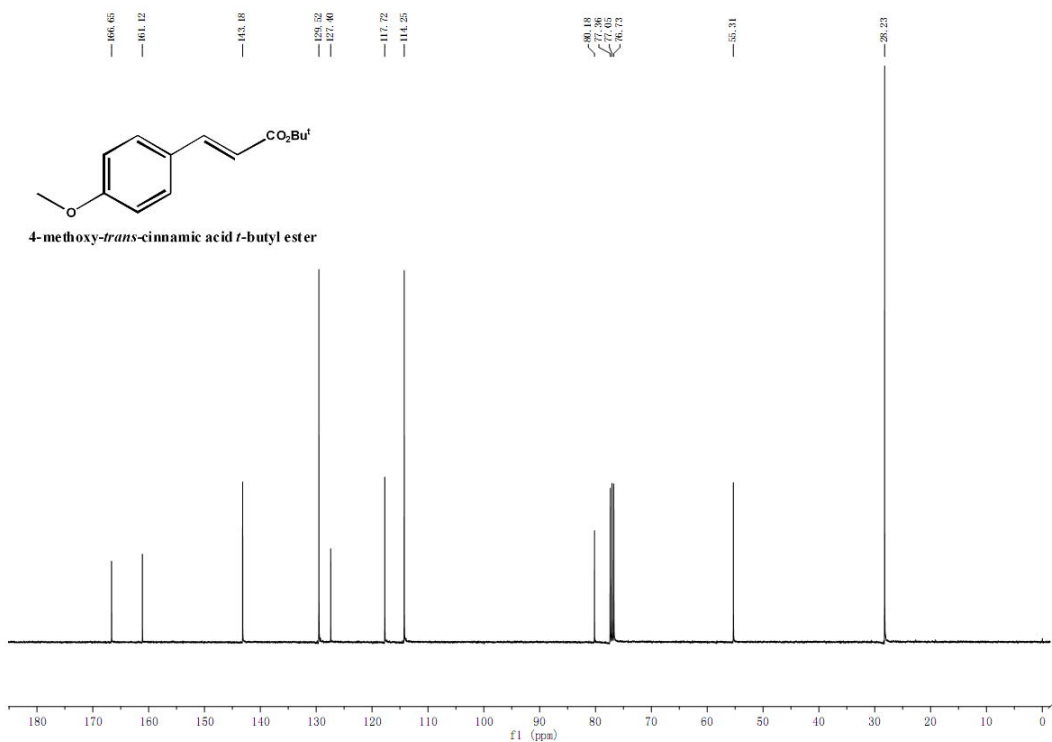

### (8) 4-acetyl-*trans*-stilbene

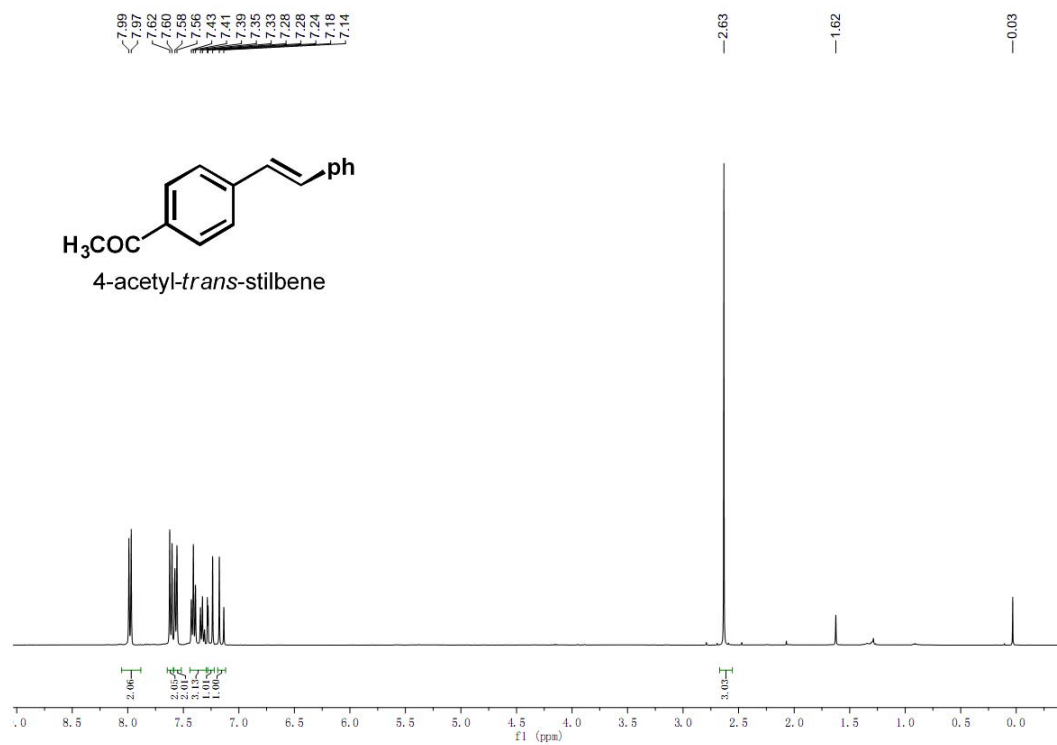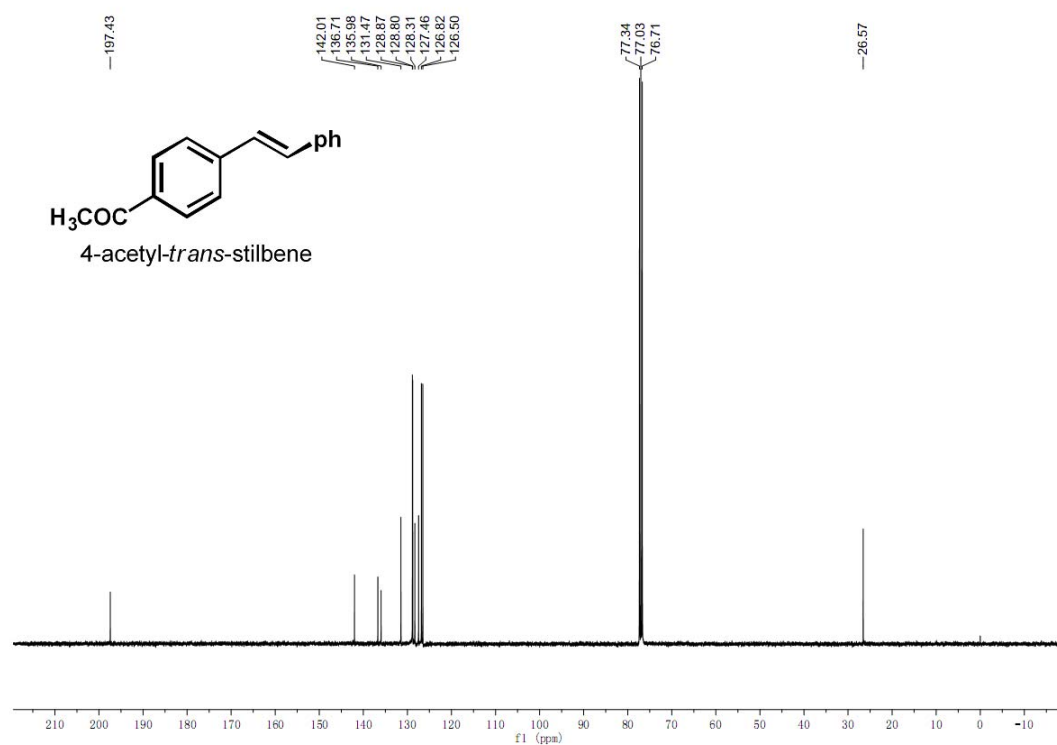

### (9) 4-acetyl-*trans*-cinnamic acid *n*-butyl ester

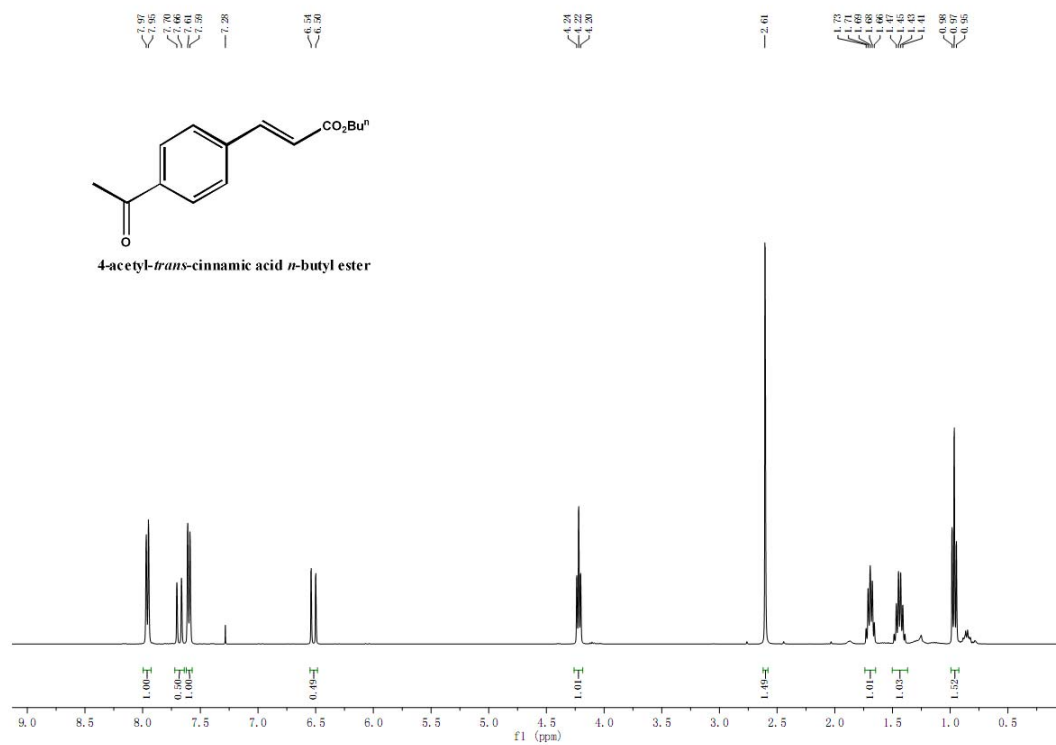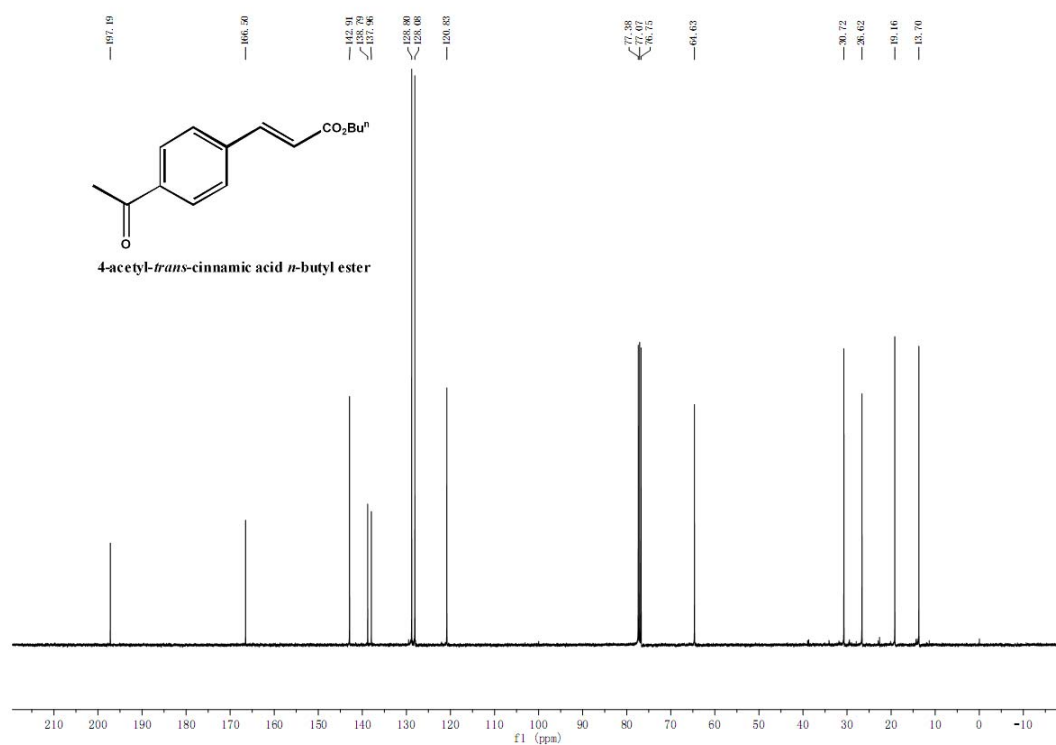

### (10) 4-acetyl-*trans*-cinnamic acid *t*-butyl ester

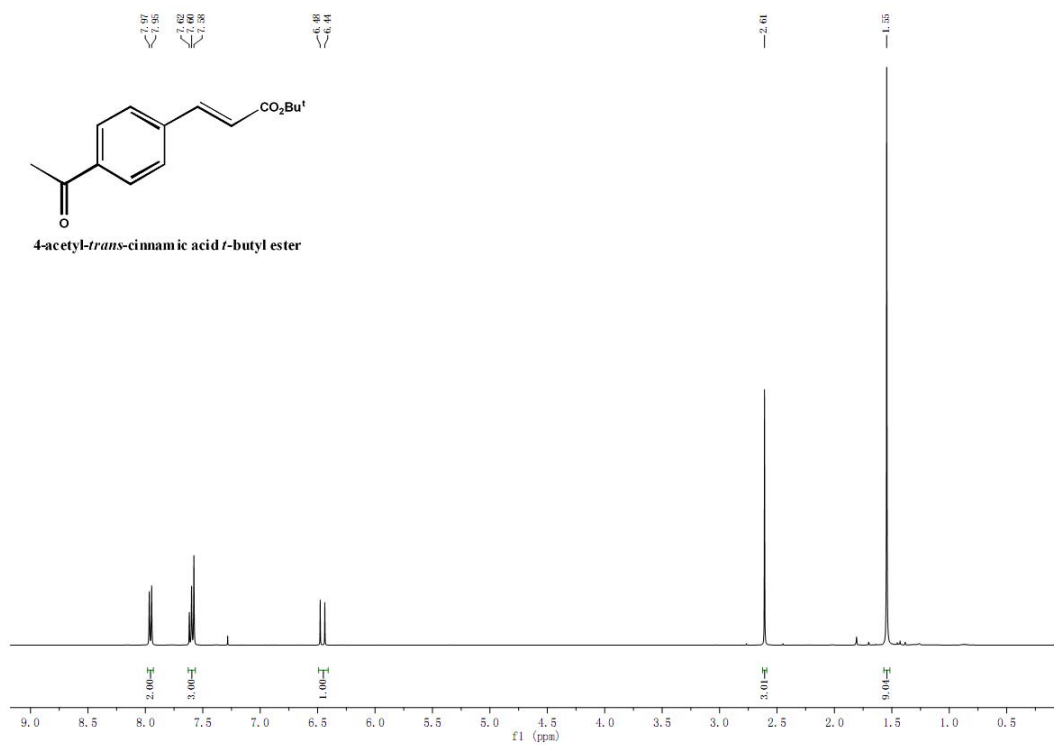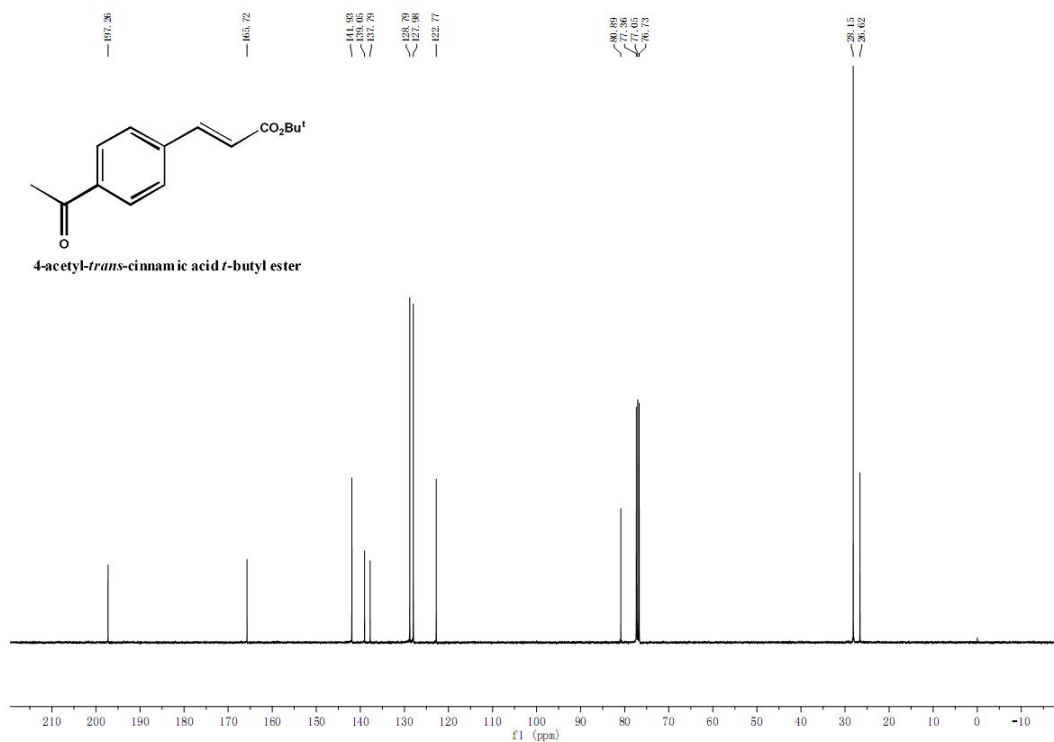

Supplement: c1cy00324k.pdf [file c1cy00324k.pdf]
